# Supplementary material
Source: Springer Nature journal article supplement (https://www.springermedizin.de/resource/supplementary/12865_2009_256_MOESM3_ESM.pdf/9427612)

## 1.) direct contact of OE21 cells with PMN

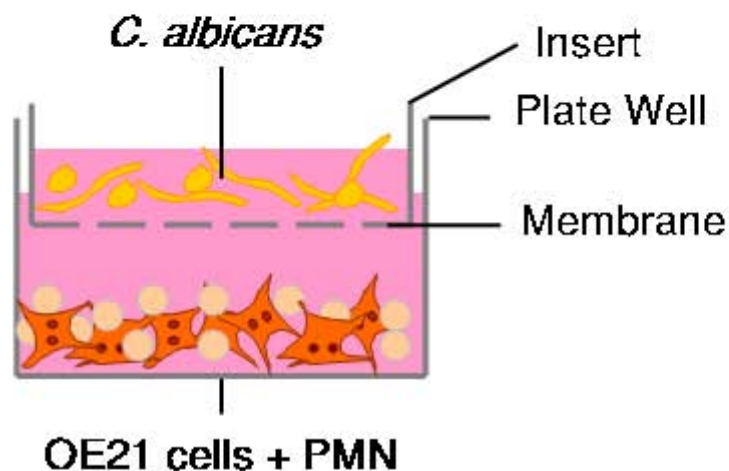

## 2.) direct contact of OE21 cells with *C. albicans*

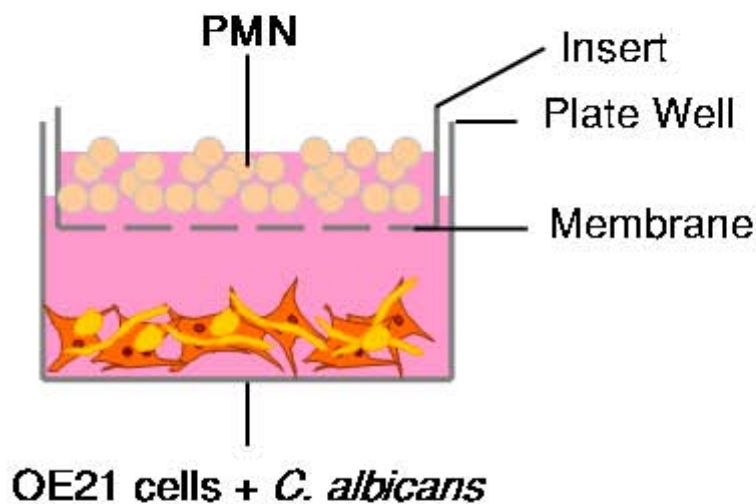

Supplement: MOESM3 [file 9427612]
